# CORRECTION

## Correction: A Long-Term Assessment of the Variability in Winter Use of Dense Conifer Cover by Female White-Tailed Deer

The PLOS ONE Staff

The images for Figs 1, 2 and 3 are incorrectly switched. The image that appears as Fig 1 should be should be Fig 3; The image that appears as Fig 2 should be Fig 1; The image that appears as Fig 3 should be Fig 2. The figure legends appear in the correct order. The publisher apologizes for the errors.

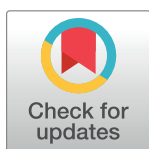

### OPEN ACCESS

**Citation:** The PLOS ONE Staff (2017) Correction: A Long-Term Assessment of the Variability in Winter Use of Dense Conifer Cover by Female White-Tailed Deer. PLoS ONE 12(5): e0178964. <https://doi.org/10.1371/journal.pone.0178964>

**Published:** May 30, 2017

**Copyright:** © 2017 The PLOS ONE Staff. This is an open access article distributed under the terms of the [Creative Commons Attribution License](https://creativecommons.org/licenses/by/4.0/), which permits unrestricted use, distribution, and reproduction in any medium, provided the original author and source are credited.

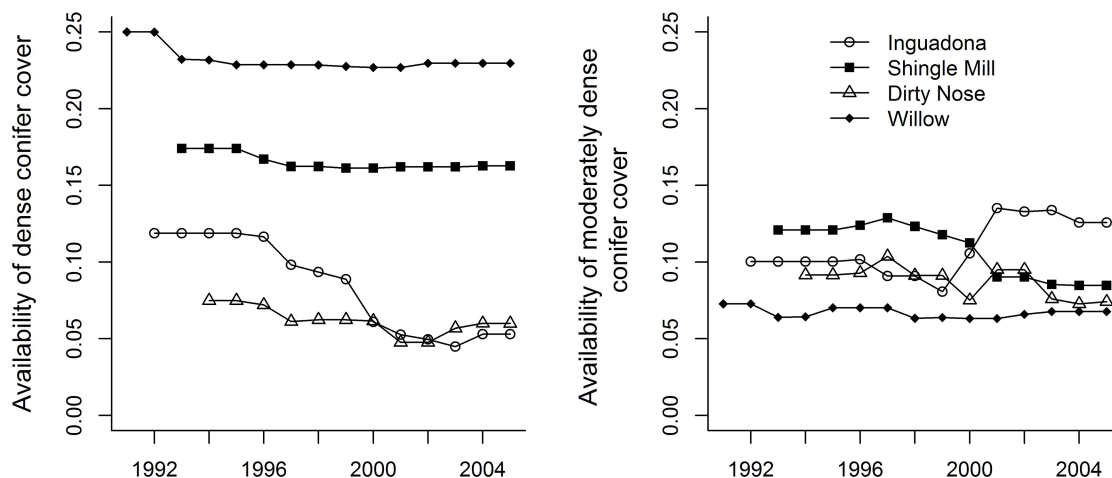

**Fig 1. Availability (versus time) of dense ( $\geq 70\%$  canopy closure, left panel) and moderately dense ( $40\% \leq x < 70\%$  canopy closure, right panel) conifer cover for each of four study sites, north-central Minnesota, 1991–2005.** First-year baseline was dependent on the year the site was incorporated into the study and habitat quantified.

<https://doi.org/10.1371/journal.pone.0178964.g001>

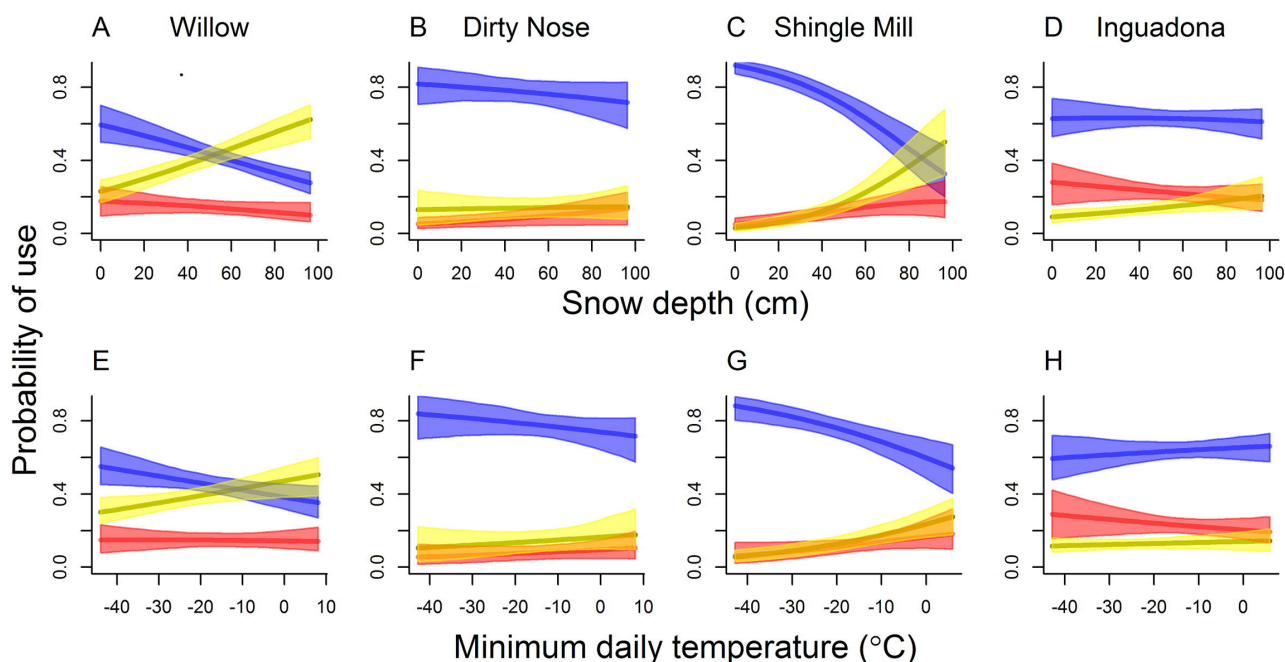

**Fig 2. Model-based predicted probabilities of adult ( $\geq 1.5$  years old), female white-tailed deer using dense ( $\geq 70\%$  canopy closure, yellow) and moderately dense ( $40\% \leq x < 70\%$  canopy closure, red) conifer cover, and “other” (here includes conifer with  $< 40\%$  canopy closure, openings, and hardwoods; blue) during daytime hours (i.e., 0730–1700 hr) as a function of snow depth (panels A–D) and minimum daily temperature (panels E–H), for each of four study sites, north-central Minnesota, 1 November–14 May 1993–1994 to 2004–2005.** Colored bands depict point-wise 95% bootstrap confidence intervals. To generate model-based response curves, we set availabilities of each habitat type to site-specific mean values. Similarly, we set daily snow depths (for top panels) and minimum temperatures (for top panels) to site-specific means.

<https://doi.org/10.1371/journal.pone.0178964.g002>

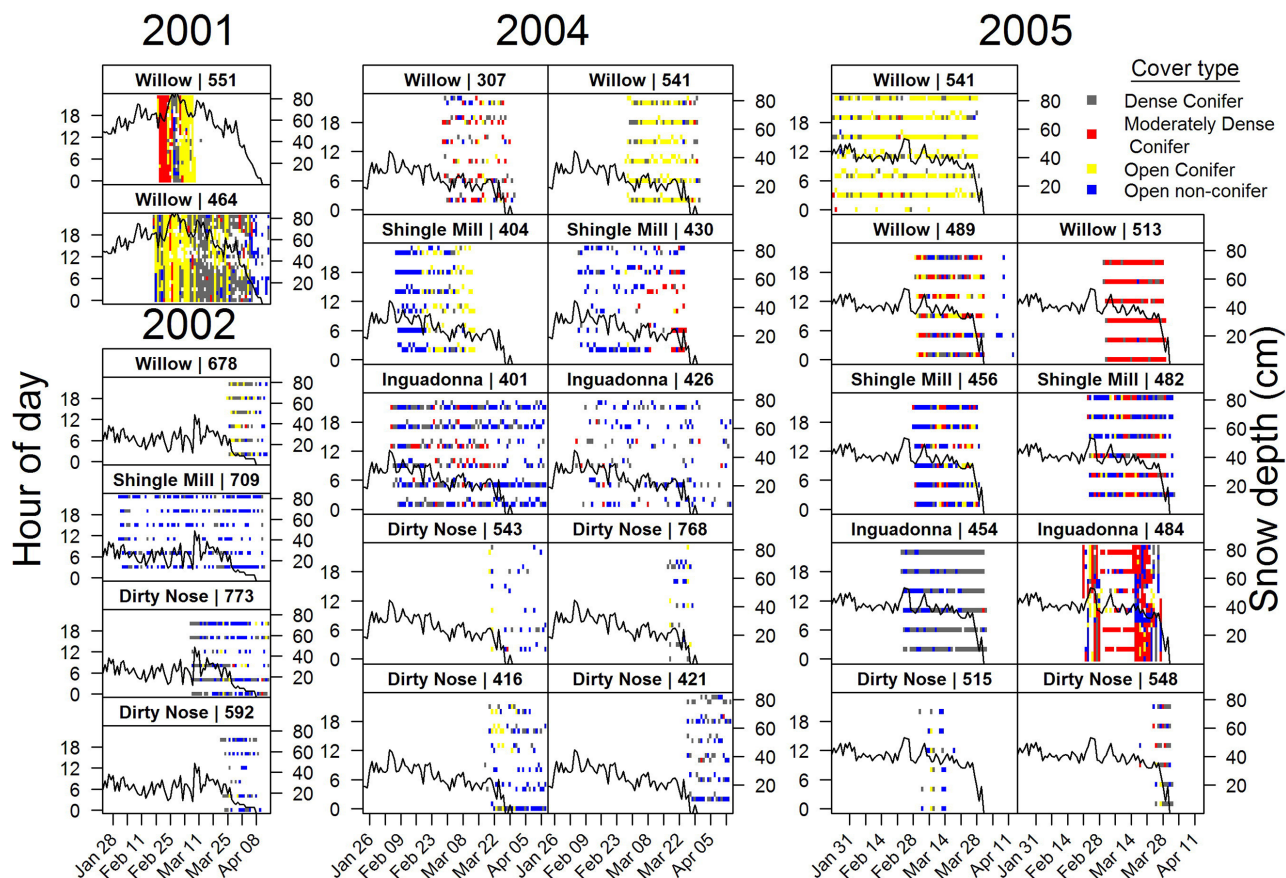

**Fig 3. Date-time plots illustrating individual variability in use of dense ( $\geq 70\%$  canopy closure), moderately dense ( $40\% \leq x < 70\%$  canopy closure), and open conifer cover ( $< 40\%$  canopy closure), and open non-conifer types (openings and hardwood types) by adult ( $\geq 1.5$  years old), female white-tailed deer monitored using Global Positioning System (GPS) collars collecting locations hourly or every four hours on four study sites, north-central Minnesota, 23 January–14 April 2001, 2002, 2004, and 2005. The solid black line represents average weekly snow depths.**

<https://doi.org/10.1371/journal.pone.0178964.g003>

## Reference

1. DelGiudice GD, Fieberg JR, Sampson BA (2013) A Long-Term Assessment of the Variability in Winter Use of Dense Conifer Cover by Female White-Tailed Deer. *PLoS ONE* 8(6): e65368. <https://doi.org/10.1371/journal.pone.0065368> PMID: 23785421
